1 **Microbes follow Humboldt: temperature drives plant and soil**  
2 **microbial diversity patterns from the Amazon to the Andes**

3

4 Andrew T. Nottingham<sup>1,3</sup>, Noah Fierer<sup>2</sup>, Benjamin L. Turner<sup>3</sup>, Jeanette Whitaker<sup>4</sup>, Nick J. Ostle<sup>5</sup>,  
5 Niall P. McNamara<sup>4</sup>, Richard D. Bardgett<sup>6</sup>, Jonathan W. Leff<sup>2</sup>, Norma Salinas<sup>7</sup>, Miles Silman<sup>8</sup>,  
6 Loeske Kruuk<sup>9</sup> & Patrick Meir<sup>1,9</sup>

7 <sup>1</sup>*School of Geosciences, University of Edinburgh, Crew Building, Kings Buildings, Edinburgh EH9 3FF, UK*

8 <sup>2</sup>*Department of Ecology and Evolutionary Biology, Cooperative Institute for Research in Environmental Sciences,*  
9 *University of Colorado, Boulder, CO, USA*

10 <sup>3</sup>*Smithsonian Tropical Research Institute, 0843-03092, Balboa, Ancon, Republic of Panama*

11 <sup>4</sup>*Centre of Ecology and Hydrology, Lancaster Environment Centre, Lancaster LA1 4AP, UK*

12 <sup>5</sup>*Lancaster Environment Centre, Lancaster University, Library Avenue, Lancaster LA1 4YQ, UK*

13 <sup>6</sup>*School of Earth and Environmental Sciences, Michael Smith Building, The University of Manchester, Oxford Road,*  
14 *Manchester M13 9PT, UK*

15 <sup>7</sup>*Seccion Química, Pontificia Universidad Católica del Peru, Lima, Peru*

16 <sup>8</sup>Wake Forest University, Winston-Salem, NC, USA

17 <sup>9</sup>*Research School of Biology, Australian National University, Canberra, ACT 2601, Australia*

18

19

20

21

22

23

24

25

26 **Summary**

27 More than 200 years ago, von Humboldt reported decreases in tropical plant species richness  
28 with increasing elevation and decreasing temperature. Surprisingly, co-ordinated patterns in  
29 plant, bacterial and fungal diversity on tropical mountains are yet to be observed, despite the  
30 central role of soil microorganisms in terrestrial biogeochemistry. We studied an Andean  
31 transect traversing 3.5 km in elevation to test whether the species diversity and composition  
32 of tropical forest plants, soil bacteria and fungi can follow similar biogeographical patterns  
33 with shared environmental drivers. We found co-ordinated changes with elevation in all three  
34 groups: species richness declined as elevation increased, and the compositional-dissimilarity  
35 of communities increased with increased separation in elevation, although changes in plant  
36 diversity were larger than in bacteria and fungi. Temperature was the dominant driver of  
37 these diversity gradients, with weak influences of edaphic properties, including soil pH. The  
38 gradients in microbial diversity were strongly correlated with the activities of enzymes  
39 involved in organic matter cycling, and were accompanied by a transition in microbial traits  
40 towards slower-growing, oligotrophic taxa at higher elevations. We provide the first evidence  
41 of co-ordinated temperature-driven patterns in the diversity and distribution of three major  
42 biotic groups in tropical ecosystems: soil bacteria, fungi and plants. These findings suggest  
43 that, across landscape scales of relatively constant soil pH, inter-related patterns of plant and  
44 microbial communities with shared environmental drivers can occur, with large implications  
45 for tropical forest communities under future climate change.

46

47 **Keywords:** biogeography, elevation gradient, microbial ecology, plant ecology, Peru,  
48 phylogenetic diversity, tropical forests

49

50 **1. Introduction**

51 Climate regulates plant community composition and diversity. This observation is  
52 exemplified by the existence of changes in plant species diversity and community structure  
53 with elevation along mountainsides – first reported in a classical study of the tropical Andes  
54 by the 19<sup>th</sup> century naturalist Alexander von Humboldt (von Humboldt and Bonpland 1805).  
55 However, it is not clear if soil bacteria and fungi, key drivers of terrestrial biogeochemical  
56 cycling, follow similar biogeographical patterns determined by the same climatic drivers.  
57 Microbes are the most diverse and abundant organisms on Earth (Whitman et al. 1998) and  
58 perform vital metabolic functions including the decomposition of organic matter, recycling of  
59 nutrients, and formation of root symbioses, all of which can affect the productivity and  
60 diversity of plants (Bardgett and van der Putten 2014). Given their small size, abundance and  
61 short life cycles relative to plants and animals, microorganisms were long-assumed to be  
62 cosmopolitan in their distributions (Baas Becking 1934). Recent work has challenged this  
63 paradigm, highlighting the importance of environmental filtering, historical events, stochastic  
64 speciation and dispersal processes in shaping microbial biogeography (Fierer and Jackson  
65 2006, Martiny et al. 2006, Tedersoo et al. 2014). Relationships between plant and soil  
66 microbes are now starting to be revealed (Tedersoo et al. 2014, Barberán et al. 2015, Prober  
67 et al. 2015, Zhou et al. 2016), but important questions concerning their relationships over  
68 landscape gradients remain open, especially for tropical forests. The high productivity and  
69 species richness of tropical rainforests (Pianka 1966, Pan et al. 2011) translates to a greater  
70 quantity and chemical diversity of organic matter inputs to their soils and a greater diversity  
71 of plant-microbial associations. Together, these characteristics point towards more  
72 opportunities for associations between plant and microbial species than in temperate or high-  
73 latitude biomes (Hattenschwiler et al. 2008, Mangan et al. 2010, Fanin et al. 2014),

74 potentially leading to co-ordinated changes in biota across climatic gradients within tropical  
75 forests.

76         The large temperature gradients on mountains have proven invaluable for  
77 understanding how temperature influences plant diversity, community composition and  
78 productivity (Colwell et al. 2008). Shifts in the diversity of plant and animal taxa with  
79 changes in elevation along mountainsides globally are thought to result principally from  
80 differences in energy limitation and/or niche differentiation, leading to a typically monotonic  
81 decrease or mid-elevation peak in above-ground species richness with elevation (Rahbek  
82 2005). Elevation gradients can also help us to understand the influence of temperature on the  
83 diversity and functional attributes of soil microbial communities and their role in soil organic  
84 matter cycling (Bryant et al. 2008, Geml 2017). However, such studies have not shown the  
85 strong elevation-related pattern of diversity observed for plants. Studies of bacterial richness  
86 have revealed contrasting patterns, strongly influenced by multiple additional drivers,  
87 particularly the large between-sample variations in rainfall or soil pH that have accompanied  
88 such studies (Bryant et al. 2008, Shen et al. 2013, Singh et al. 2014, Peay et al. 2017).  
89 Similarly contrasting patterns have been found in studies of fungal richness, which have  
90 generally targeted specific groups that vary in their elevation relationship by functional type  
91 and plant-host specificity (reviewed in (Geml 2017, Kivlin et al. 2017)). Any of these sources  
92 of sample variance could obscure an underlying temperature-microbial diversity relationship.  
93 The diversity and functional attributes of bacteria and fungi along elevation gradients in  
94 tropical forests are especially poorly resolved.

95         We would expect the biogeographical patterns of plants and soil microbes to be  
96 related, as suggested by studies that have associated microbial communities with plant leaf  
97 litter traits (Orwin et al. 2010, de Vries et al. 2012, Handa et al. 2014); and a strong  
98 association between plant leaf traits (i.e. chemical diversity) and soil microbial species

99 assemblages has been hypothesised for tropical forests where there is sufficiently wide inter-  
100 specific variation in leaf traits (Hattenschwiler et al. 2008). Where this question has been  
101 addressed in the tropics, a relationship between the chemical composition of leaf-litter and  
102 the underlying microbial community composition has been demonstrated in an incubation  
103 experiment (Fanin et al. 2014), but there was no overall relationship between plant and soil  
104 microbial species diversity in a study of a single, albeit large, forest plot (Barberán et al.  
105 2015). However, the issue has not yet been investigated at a larger biogeographical scale in  
106 the tropics. A global study of grasslands found relationships between plant, bacterial and  
107 fungal  $\beta$ -diversity, but not  $\alpha$ -diversity (Prober et al. 2015). Plant and fungal  $\alpha$ -diversity were  
108 positively related across a global latitudinal gradient (Tedersoo et al. 2014) and detailed  
109 relationships have been shown for specific groups of fungi (Geml 2017, Kivlin et al. 2017).  
110 These biogeographical patterns have not been observed for bacteria (Bardgett and van der  
111 Putten 2014, Prober et al. 2015), possibly due to the wide variation in soil pH which likely  
112 confounds sampling for biogeographical patterns in bacteria in studies that do not constrain  
113 its variation (Fierer and Jackson 2006). In summary, some work points towards related  
114 biogeographical patterns among plant and microbial communities (Tedersoo et al. 2014,  
115 Prober et al. 2015), elsewhere evidence is inconclusive or partly contradictory (de Vries et al.  
116 2012, Barberán et al. 2015) and especially so for tropical forest.

117         In this study, we used a 3.5 km tropical elevation gradient (~ 6.5 to 26.4 °C mean  
118 annual temperature range) in the Peruvian Andes (figure 1), to ask: do related  
119 biogeographical patterns in plant, bacterial and fungal species diversity ( $\alpha$ -diversity) and  
120 compositional dissimilarity of communities ( $\beta$ -diversity) occur across large environmental  
121 gradients, and does temperature drive these patterns where other environmental variables are  
122 constrained? Importantly, the variation along this elevation gradient in the key  
123 environmental variables of soil pH and moisture was very limited (table S1), meaning that

124 our data would be minimally affected by other key potential environmental factors that may  
125 confound any effect of temperature on soil biota. We sampled at high density considering the  
126 logistical challenges of the environment (14 sites in total, with soil data from two separate  
127 horizons). We determined the  $\alpha$ -diversity and  $\beta$ -diversity for plants and soil microbes, by  
128 using field surveys of 1 ha permanent sample plots for plants and high-throughput sequencing  
129 for soil microbes. We analysed a large suite of environmental and soil properties, including  
130 soil extracellular enzymes, to determine the environmental drivers of these plant and  
131 microbial diversity patterns, and how those patterns were related to indices of organic matter  
132 cycling.

## 133 **2. Materials and Methods**

### 134 **2.1 Study sites**

135 The elevation transect under study lies on the Eastern flank of the Andes in South Eastern  
136 Peru, in the upper Madre de Dios/Madeira watershed (figure 1) (Nottingham et al. 2015b).  
137 The transect spans 3450 m in elevation from 194 to 3644 m above sea level (asl) and consists  
138 of 14 sites, each with a 1 ha permanent sampling plot, all in old growth tropical forest except  
139 for one site on high elevation grassland (figure 1, table S1). The sites are roughly evenly  
140 distributed by elevation but not spatial separation: the transect is approximately 270 km in  
141 length, with 35 km between the upper 12 sites and 12 km between the upper 9 sites. Mean  
142 annual temperature (MAT) decreases with increasing elevation across the transect (dropping  
143 from 26 °C to 6 °C), but mean annual precipitation (MAP) does not vary consistently with  
144 elevation, ranging from 1506-5302 mm yr<sup>-1</sup> among the sites, with no evidence of soil  
145 moisture constraints at any (Zimmermann et al. 2010). The plots are situated on  
146 predominantly Paleozoic (~450 Ma) meta-sedimentary mudstone (~80%), with plutonic  
147 intrusions (granite) underlying the sites between 1500 and 2020 m asl. The soils at the sites

148 above 2520 m are Umbrisols (Inceptisols), while the soils from 1000 to 2020 m are  
149 Cambisols (Inceptisols). The soils below 1000 m, at the two lowland sites, are Haplic Allisols  
150 (Ultisols) (194 m asl) and Haplic Cambisols (Inceptisols) (210 m asl) (according to FAO,  
151 with USDA Soil Taxonomy in parentheses). Further descriptions of soil, climate and floristic  
152 composition of these sites are reported elsewhere (Rapp et al. 2012, Whitaker et al. 2014).

153 *Plant and soil data collection.* Soil and microbial properties were determined for 14  
154 sites (13 forest, 1 high elevation grassland). Plant diversity was determined in the 13 forest  
155 sites, resulting in 13 sites with both tree and microbial data. For the 13 forest sites, trees were  
156 measured in each 1 ha plot, where every individual tree  $\geq 10$  cm diameter at breast height  
157 (1.3 m) was measured, tagged and identified to species or morphospecies. Plants were  
158 censused during 2007-2012; for further details on methodology see Rapp et al. (2012). For all  
159 sites, soil samples were collected during January 2012 from five systematically distributed  
160 sampling points in the 1 ha plots. These ecosystems are highly aseasonal, with no significant  
161 intra-annual variation in mean monthly temperature and no evidence of seasonal soil or plant  
162 moisture constraints (Zimmermann et al. 2010, van de Weg et al. 2014), therefore the  
163 comparison of soil properties for these sites at a single time point was representative of  
164 patterns likely to be found throughout the year. We used composite soil samples composed of  
165 three replicates for DNA extraction because our aim, for both plants and soil microorganisms,  
166 was to characterize the overall diversity and community composition by plot (rather than to  
167 investigate the spatial variation within the plot). However, we used five spatial replicates for  
168 all other analyses, to quantify the within-plot variation for edaphic properties. We collected  
169 and analysed samples from both organic and mineral horizons, with the mineral horizon  
170 samples coming from the upper 10 cm of the mineral layer. Soil samples were stored for < 14  
171 days at < 4 °C until DNA extraction and determination of nutrient content and enzyme

172 activities; this method has been shown to have negligible effects on these soil properties  
173 (Lauber et al. 2010, Turner and Romero 2010).

#### 174 **Soil analyses: DNA sequencing, nutrients and extracellular enzyme activities**

175 Microbial diversity was assessed using high-throughput sequencing to characterise the  
176 variation in marker gene sequences (Fierer et al. 2012). For bacterial community  
177 composition, the 16S rRNA gene was amplified in triplicate PCR reactions using the 515f  
178 and 806r primers. For fungal community composition, the first internal transcribed spacer  
179 region (ITS1) of the rRNA gene was amplified using the ITS1-F and ITS2 primer pair. Raw  
180 sequence data were processed using the QIIME v1.7 pipeline, where sequences were de-  
181 multiplexed using their unique barcode specific to individual samples and assigned to  
182 phylotypes (operational taxonomic units, OTUs, at 97% similarity). Taxonomy was  
183 determined for each phylotype using the RDP classifier (Wang et al. 2007) trained on the  
184 Greengenes (McDonald et al. 2012) and UNITE (Abarenkov et al. 2010) databases for  
185 bacterial and fungal sequences (see Supplementary Information for further detail).

186 *Soil characteristics:* We determined the following edaphic variables: total carbon (C),  
187 total nitrogen (N), total phosphorus (P), organic P, resin-extractable P (resin P), resin-N,  
188 cation exchange capacity (ECEC) and exchangeable cations (Al, Ca, Cl, Fe, K, Mn, Mg, Na),  
189 soil pH, bulk density, moisture content and activities of seven soil enzymes (Nottingham et  
190 al. 2012) (see Supplementary Information for further detail).

#### 191 ***2.3 Measures of $\alpha$ - and $\beta$ -diversity***

192 We analysed estimates of  $\alpha$ - and  $\beta$ -diversity for each biotic group. For plants,  $\alpha$ -diversity  
193 measures came from Shannon species diversity indices for each plot and therefore constituted  
194 a single measure per site (n = 13 sites in total, as there was no plant diversity measure from  
195 the grassland site). Bacterial and fungal  $\alpha$ -diversity were determined using Shannon species



196 diversity indices based on the abundance of OTUs for soil bacteria and fungi. We determined  
197  $\beta$ -diversity (community composition) using dissimilarity matrices (Sørensen and Bray-Curtis  
198 for plants and soil microbes, respectively). The process was repeated separately for the  
199 organic and the mineral horizons. Our data-set therefore consisted of the following five  
200 measures of  $\alpha$ -diversity and  $\beta$ -diversity for each site: plants, fungal-organic, fungal-mineral,  
201 bacterial-organic and bacterial-mineral.

## 202 **2.4 Statistical analyses**

203 Our main hypotheses that 1)  $\alpha$ - and  $\beta$ -diversity measures across biotic groups are  
204 related and 2) have shared environmental drivers, were addressed by using linear and linear  
205 mixed-models for  $\alpha$ -diversity (mixed effects models) and multivariate methods for  $\beta$ -  
206 diversity (permutational-MANOVA (PERMANOVA), Principal Co-ordinates Analyses  
207 (PCA), Mantel tests and multivariate correlation models). The effects of elevation on  $\alpha$ -  
208 diversity were tested using a linear model for plant diversity and linear mixed-effects models  
209 for each of the four measures of microbial diversity. Elevational differences in  $\beta$ -diversity  
210 were examined using PERMANOVA, PCA and Mantel tests. The effects of climate and  
211 edaphic variables on  $\alpha$ -diversity were addressed by testing for effects of six specific variables  
212 on  $\alpha$ -diversity: MAT, MAP, pH, total C, ECEC and resin P, using a linear model for plant  
213 diversity, and linear mixed models for each of the four measures of soil microbial diversity.  
214 To test for the effects of climate and edaphic variables on  $\beta$ -diversity we used BIO-ENV  
215 multivariate correlation models (Clarke and Ainsworth 1993), which creates a model by step-  
216 wise selection, determining high-rank correlations between species dissimilarity matrices and  
217 resemblance matrices generated from environmental variables (31 in total). Detailed  
218 descriptions of these statistical tests are provided in supplementary material. All statistical  
219 analyses were performed in either R (version 3.4.1) or PRIMER (version 6.1.12; PRIMER-E,  
220 Plymouth, UK). The combined analysis allowed us to: 1) determine whether diversity

221 patterns in plants, bacteria and fungi are related; 2) infer the principal environmental or  
222 edaphic drivers of the observed patterns in diversity; and 3) test whether the diversity and  
223 community composition of soil microorganisms influence soil processes along a tropical  
224 environmental gradient.

### 225 **3. Results**

226 *Effect of elevation on  $\alpha$ -diversity.* There were significant differences between biotic groups in  
227 their average levels of  $\alpha$ -diversity (linear mixed model, group effect:  $F = 1093$ ;  $df = 4, 165$ ;  $p$   
228  $< 0.001$ ), which increased in the order: plants  $<$  fungi  $<$  bacteria (figure 2). For each group,  
229 all  $\alpha$ -diversity measures declined with increased elevation, except for fungal diversity in the  
230 organic horizon (table S2). For plant, fungal-mineral and bacterial-organic  $\alpha$ -diversity, the  
231 decline with elevation was best described with a linear model (table S2a, c, d). For fungal-  
232 organic and bacterial-mineral  $\alpha$ -diversity, the change was non-linear: for fungal-organic,  $\alpha$ -  
233 diversity was lowest at mid-elevation (figure 2b, table S2b) whereas for bacterial-mineral,  $\alpha$ -  
234 diversity only showed significant declines at the higher elevations (figure 2c, table S2e). The  
235 effects of elevation on  $\alpha$ -diversity were therefore mostly negative, but there were also  
236 significant differences among groups in the exact pattern of change with elevation (combined  
237 linear mixed model, group: elevation interaction:  $F = 23.48$ ;  $df = 5, 87$ ;  $p < 0.001$ ; between  
238 group and elevation<sup>2</sup>:  $F = 7.80$ ;  $df = 5, 86$ ;  $p < 0.001$ ). Plants showed the steepest decline in  $\alpha$ -  
239 diversity with elevation (slope =  $-0.753 \pm 0.094$ ; table S2).

240 *Effects of climate and edaphic variables on  $\alpha$ -diversity.* Mean annual temperature  
241 (MAT) was the dominant determinant of the patterns in  $\alpha$ -diversity for all biotic groups and  
242 in both soil horizons, with the exception, again, of fungal-organic (table 1). Plant  $\alpha$ -diversity  
243 increased significantly with MAT, but also increased with mean annual precipitation (MAP;  
244 table 1a). Fungal-organic  $\alpha$ -diversity was not correlated to either climatic variable, but

245 instead declined significantly with increasing ECEC (table 1b). For both mineral horizon  
246 measures (fungal and bacterial), the only variable with any significant effect was MAT (table  
247 1c, 1e). Bacterial-organic  $\alpha$ -diversity was also positively affected by MAT, and additionally  
248 by resin-P (table 1d). Full models with all six variables showed the same qualitative results  
249 (table S3). In summary, temperature (MAT) had a nearly-universally significant positive  
250 effect on  $\alpha$ -diversity, but precipitation (MAP), ECEC and resin-P were all also relevant for  
251 certain biotic group-soil horizon combinations.

252 *Correlations between  $\alpha$ -diversity of different groups.* Plant  $\alpha$ -diversity was most  
253 strongly positively correlated with that of bacteria  $\alpha$ -diversity, especially in the organic  
254 horizon ( $r = 0.83$ ; table S4). The coupling of plant and bacterial  $\alpha$ -diversity also appeared to  
255 be more conserved than for plant and fungal  $\alpha$ -diversity: the ratio in the Shannon diversity  
256 index for plants:bacteria varied with elevation by less than half that for plants:fungi, in both  
257 mineral and organic horizons (figure 3). There were also strong positive correlations between  
258  $\alpha$ -diversity for the two soil horizons for bacteria ( $r = 0.81$ ), but not for fungi ( $r = 0.30$ ).  
259 Overall, the fungal organic  $\alpha$ -diversity showed the weakest coupling to any of the other  
260 measures (table S4).

261 *Elevation patterns in  $\beta$ -diversity of different groups.* The composition of plant,  
262 bacterial and fungal communities differed with elevation (differences in  $\beta$ -diversity; all  
263 comparisons by PERMANOVA;  $p < 0.001$ ; figure 4), were characterised by exponential  
264 relationships whereby community compositional dissimilarity tended towards a maximum  
265 (dissimilarity = 1) with increased elevational separation (figure 4). Fungi exhibited the largest  
266 compositional dissimilarities of communities with elevation, followed by plant and then  
267 bacteria communities. The  $\beta$ -diversity of bacteria and fungi also differed between organic and  
268 mineral horizons (figure S2), although fungi differed to a lesser extent than bacteria (all  
269 comparisons by PERMANOVA;  $p < 0.001$ ). The differences in soil microbial  $\beta$ -diversity

270 with elevation were reflected by shifts in dominant phyla (figure S3). For bacteria, increased  
271 elevation was associated with an increased dominance of *Acidobacteria* and  
272 *Betaproteobacteria*, and decreased dominance of *Actinobacteria* and *Deltaproteobacteria*;  
273 the patterns occurred in both horizons, although mineral horizons contained a greater  
274 proportion of *Acidobacteria* (figure S3a). For fungi, increased elevation was associated with  
275 increased dominance of Ascomycota (*Archaeorhizomyces*, *Leotiomyces*), Basidiomycota  
276 (*Microbotryomyces*), and decreased dominance of other Ascomycota (*Sodariomyces*,  
277 *Dothideomyces*, *Eurotiomyces*) and Glomeromycota (figure S3b; table S5). The  $\beta$ -  
278 diversity patterns observed for bacteria and fungi were correlated with those observed for  
279 plants (figure 4). Patterns in  $\beta$ -diversity were correlated between plants and bacteria (organic  
280 horizon  $\rho = 0.81$ ; mineral horizon  $\rho = 0.88$ ) and plants and fungi (organic horizon  $\rho = 0.67$ ;  
281 mineral horizon  $\rho = 0.79$ ; by Mantel tests;  $p < 0.001$  for all comparisons). Thus, plants and  
282 several major taxonomic groups of both bacteria and fungi showed clear and correlated  
283 changes in composition with elevation.

284 *Effects of climate and edaphic variables on  $\beta$ -diversity.* As with  $\alpha$ -diversity, MAT  
285 was the strongest correlate of patterns in  $\beta$ -diversity. MAT was the most significant  
286 parameter in multivariate models for  $\beta$ -diversity of plants, bacteria in both organic and  
287 mineral horizons, and fungi in mineral horizons (table 2). There were additional correlations  
288 between the  $\beta$ -diversity of bacteria and fungi, and dissimilarity matrices of organic nutrient  
289 concentrations and their ratios; these were stronger in the organic compared to mineral  
290 horizons (figure S4). Nutrients other than N and P were also correlated with  $\beta$ -diversity,  
291 including K for plants and Na for bacteria (table 2). Soil pH affected bacterial  $\beta$ -diversity, but  
292 not fungal  $\beta$ -diversity (table 2).

293 *Soil  $\beta$ -diversity and function.* The activities of seven soil enzymes decreased with  
294 increased elevation but at different rates, and independently of differences in ambient

295 temperature (figure S5). These patterns reflected responses in the microbial community to  
296 shifts in substrate availability in the soil. For example, relative microbial investment into  
297 different enzymes shifted with increased elevation, from enzymes that degrade P- to N-  
298 containing organic compounds (Nottingham et al. 2015a). Strong relationships between the  
299 differential activity of these seven enzymes and differences in  $\beta$ -diversity were found for  
300 bacteria ( $\rho = 0.75$ ) and fungi ( $\rho = 0.74$ ) in organic horizons (figure S6; by Mantel tests;  $p <$   
301 0.001 for all comparisons).

#### 302 **4. Discussion**

303 Overall, our results demonstrate a fundamental role for environment, principally temperature,  
304 in co-ordinating the diversity and community composition of plants, soil bacteria and fungi  
305 along an extensive 3.5 km elevation gradient in tropical forest. For all three biotic groups,  
306 species richness ( $\alpha$ -diversity) declined as elevation increased, and the compositional  
307 dissimilarity of communities ( $\beta$ -diversity) increased with increased elevation difference  
308 between communities, although the changes in plant  $\alpha$ -diversity were larger than in bacteria  
309 and fungi (figures 2, 3). While environmental filtering at large geographic scales has been  
310 suggested to shape community composition for plants, soil bacteria and fungi independently  
311 (Tedersoo et al. 2014, Prober et al. 2015), this has not been reported before for both  $\alpha$ -  
312 diversity and  $\beta$ -diversity and across all three biotic groups together. Fundamentally,  
313 temperature, and to a much lesser extent rainfall and edaphic properties, were strongly  
314 associated with variation in plant, bacterial and fungal  $\alpha$ -diversity (from linear models; table  
315 1) and  $\beta$ -diversity (from multivariate models; table 2).

316 The role of temperature in determining microbial  $\beta$ -diversity is also illustrated by  
317 shifts in the relative abundance of specific taxonomic groups. For example, there was an  
318 increased relative abundance of *Acidobacteria* and the fungi *Archaeorhizomycetes* with

319 increased elevation, but a decreased relative abundance of Actinobacteria and  
320 *Alphaproteobacteria* (figure S3). These major taxonomic groups have been associated with  
321 oligotrophic (Acidobacteria, *Archaeorhizomycetes*) and copiotrophic (Actinobacteria,  
322 *Alphaproteobacteria*) life history strategies, respectively (Fierer et al. 2007, Rosling et al.  
323 2011), which is consistent with evidence for increased energy limitation at higher, cooler  
324 elevations (Bruijnzeel et al. 2011, Nottingham et al. 2015a), favouring slower growth. The  
325 high relative abundance of the Ascomycota, *Archaeorhizomycetes* at higher elevations (figure  
326 S3) is of particular interest because this class of fungus was discovered only recently and  
327 their global distribution is poorly understood, partly because many previous analyses failed to  
328 identify them due to amplification biases (Rosling et al. 2011). They were recently identified  
329 in a range of global biomes, but generally represented <1% of relative abundance [6], which  
330 contrasts with their high abundance in our upper montane forest sites (26%; figure S1B).  
331 They are understood to be typically oligotrophic and root-associated fungi (Choma et al.  
332 2016), colonizing typical EM fungal habitats (Rosling et al. 2011). This important class of  
333 fungi, which until very recently was unknown, are a major component of the fungal biomass  
334 in these tropical montane forests.

335         Temperature was also the principal correlate of plant  $\alpha$ -diversity (table 1) and  $\beta$ -  
336 diversity (table 2). Temperature has previously been shown to be a major determinant of tree  
337 community composition across this transect (Rapp et al. 2012), and up-slope movement of  
338 tree species' lower-range limits has been observed under recent climatic warming (Duque et  
339 al. 2015). Patterns in plant species composition and richness on tropical mountains are  
340 thought to be driven mainly by the effect of geographically narrow temperature ranges on  
341 niche separation (by directly affecting metabolism and indirectly affecting resource  
342 availability), further constrained by land area, lithology and disturbance history (Janzen 1967,  
343 Colwell et al. 2008). Although the high landslide activity and soil erosion in the humid

344 Eastern Andean Cordillera (Clark et al. 2013) may be significant factors in constraining  
345 diversity at higher elevations in this region, our study identifies a central underlying role for  
346 temperature.

347 Diversity gradients were steeper for plants compared to microorganisms (figures 2-3),  
348 which is consistent with the widespread view that microorganisms are more cosmopolitan  
349 than plants in their distributions (Martiny et al. 2006). Analogous plant/microbial diversity  
350 relationships have been shown along latitudinal gradients where plant/microbial species  
351 richness ratios decrease with distance from the equator (Tedersoo et al. 2014, Zhou et al.  
352 2016). Our data indicate a stronger coupling between the  $\alpha$ -diversity of plants and bacteria  
353 compared to fungi (figure 3; table S4), but a stronger coupling between the  $\beta$ -diversity of  
354 plants and fungi than for bacteria (figure 4). The stronger coupling between the  $\beta$ -diversity of  
355 plants and fungi can be explained by coordinated shifts in the presence of obligate plant hosts  
356 among sites for symbiotic fungi (Geml 2017); which can also explain the absence of a clear  
357 elevation pattern in fungal  $\alpha$ -diversity in organic soil horizons (figure 4). Consistent with this  
358 idea, correlations between plant and fungal  $\beta$ -diversity alongside high variation in  $\alpha$ -diversity  
359 patterns among specific fungal phyla (especially those that form plant-associations), have  
360 been observed across elevation gradients in a range of ecosystems (Geml et al. 2014, Merckx  
361 et al. 2015, Looby et al. 2016, Geml 2017, Geml et al. 2017). For example, along other  
362 elevation gradients, the presence of EM and endophytic fungal hosts explained correlations in  
363 plant and fungal  $\beta$ -diversity (Geml et al. 2014) and opposing  $\alpha$ -diversity patterns have been  
364 observed for AM and EM fungi (Geml et al. 2017, Kivlin et al. 2017). The lack of clear  
365 relationship between temperature and  $\alpha$ -diversity we observed for the distinct fungal  
366 communities in organic horizons (figures 3, S2), may therefore reflect a stronger signal of  
367 plant-host associations on total fungal  $\alpha$ -diversity.

368           There was a secondary role for other environmental and edaphic properties in shaping  
369 these diversity patterns (tables 1, 2, S3; figures S4, S6), in addition to the main effect of  
370 MAT. For  $\alpha$ -diversity, cation exchange capacity explained significant variation of fungal  $\alpha$ -  
371 diversity in organic horizons, while mean annual precipitation and soil pH explained minor  
372 amounts of variation in  $\alpha$ -diversity of plants and bacteria (table 1). For  $\beta$ -diversity, there were  
373 secondary influences of nutrient ratios on microbes (C:N and C:P) and K on plants (table 4).  
374 Our data suggest that this influence of edaphic properties on microbial  $\alpha$ - and  $\beta$ -diversity is  
375 more significant for fungal  $\alpha$ -diversity and in organic horizons (tables 2, S3). Fungi are the  
376 primary decomposers of plant-derived lignocellulosic biomass and the upper part of the soil  
377 profile is where decomposition processes reflect the early stages of carbohydrate polymer  
378 breakdown. Thus, elevation-related shifts in plant litter chemistry (van de Weg et al. 2009,  
379 Salinas et al. 2010), which are known to affect soil microbial community composition (Orwin  
380 et al. 2010, de Vries et al. 2012, Fanin et al. 2014), may determine fungal  $\alpha$ -diversity patterns  
381 in organic horizons, and be an additional determinant of fungal  $\beta$ -diversity and its coupling  
382 with plant  $\beta$ -diversity.

383           Multiple lines of evidence suggest an influence of plant organic matter inputs on soil  
384 microbes, where these inputs are in turn determined by temperature effects on plant  
385 communities and production (van de Weg et al. 2014), for example: (i) the large difference in  
386 microbial diversity ( $\alpha$  and  $\beta$ ) between organic and mineral soil horizons (figures S1, S2); (ii)  
387 the stronger correlations between microbial  $\beta$ -diversity and nutrients in organic horizons  
388 compared to mineral horizons (table 2, figure S4); (iii) the overall strong correlation between  
389 plant and soil microbial diversity (table S4, figure 3); (iv) the correlation between soil  
390 microbial  $\beta$ -diversity and enzymatic activity, indices of organic nutrient degradation  
391 (Nottingham et al. 2015a) (figure S6); (v) fungal  $\alpha$ -diversity in organic horizons significantly  
392 increased above the treeline, coinciding with an abrupt change in plant organic matter inputs



393 from vegetation dominated by grassland (figure 2). Laboratory incubations of soils from this  
394 transect (Whitaker et al. 2014) and studies from tropical forest in French Guiana (Fanin et al.  
395 2011, Fanin et al. 2014), also support the link between differences in microbial community  
396 composition and organic matter inputs and their rate of degradation. Together these findings  
397 point towards a relationship between the high soil microbial diversity in tropical forests and  
398 plant organic matter inputs to soil, through the high inter- and intra-species chemical diversity  
399 in leaf litter.

400 Our results, from a 3.5 km elevation range, contrast with findings from studies of  
401 elevation gradients that examined plant and microbial  $\alpha$ -diversity and did not find such strong  
402  $\alpha$ -diversity correlations (Bryant et al. 2008, Fierer et al. 2011, Shen et al. 2013, Geml et al.  
403 2014, Shen et al. 2014, Singh et al. 2014). The fundamental temperature-microbial diversity  
404 relationships we have observed here were likely obscured in previous studies by the  
405 confounding influence of wider natural among-site variation in soil pH, soil moisture, plant-  
406 host distributions (for fungi, in particular) and, in some instances, by insufficient sampling  
407 intensity or elevation range. For example, variation in bacteria diversity along a 1850 m  
408 elevation gradient in South Korea was related to the large variation in rainfall (1713 – 3743  
409 mm) and soil pH (3.7 – 5.8) (Singh et al. 2014); large variation in rainfall (280 – 3280 mm)  
410 and soil pH also explained microbial diversity along a 950 m elevation gradient in Hawaii  
411 (Peay et al. 2017). Soil pH effects on fungal  $\alpha$ -diversity along mountain gradients have also  
412 been demonstrated (Geml 2017), including a positive effect on the  $\alpha$ -diversity of AM fungi  
413 along a large gradient in subtropical forest where soil pH varied widely (3.8 – 7.2) (Geml et  
414 al. 2014). The majority of fungal diversity studies on mountain gradients have focussed on  
415 specific phyla, reporting high variation in  $\alpha$ -diversity patterns (Geml et al. 2014, Merckx et  
416 al. 2015, Looby et al. 2016, Geml 2017, Geml et al. 2017) and strong associations with plant-  
417 host distributions such as with AM and EM-fungal associated communities (Kivlin et al.

418 2017); as previously outlined, these factors can partly explain differences in fungal  $\alpha$ -  
419 diversity patterns in organic and mineral horizons in this study. The importance of sampling  
420 intensity is demonstrated by the contrast between findings from this study of 14 sites with an  
421 earlier report from six locations along the same Andean transect where no elevation gradient  
422 in soil bacterial  $\alpha$ -diversity was found (Fierer et al. 2011): if we reduce our dataset to include  
423 only those sites represented in the earlier study, no strong elevation trends are apparent  
424 (figure S7). Similarly, these factors may have accounted for the lack of clear patterns in  
425 bacterial diversity for two temperate-zone elevation transect studies which sampled only six  
426 locations over 1670 m in Northeast China (Shen et al. 2014), and five locations over 920 m in  
427 the Rocky Mountains, the latter indicating a single-taxon increase with elevation, but no  
428 community-wide trend (Bryant et al. 2008). Last, the detection of these elevation diversity  
429 patterns may also depend on the length and, therefore, temperature range of the transect. For  
430 example, the absence of bacterial diversity patterns along a 900 m gradient in tropical  
431 montane forest in Hawaii may have been because the 5°C temperature difference did not  
432 affect plant community composition (Selmants et al. 2016). In contrast, the temperature-  
433 driven diversity patterns in bacteria and fungi demonstrated for this large Peruvian gradient  
434 (20°C temperature difference) resulted, in part, from indirect temperature effects on plant  
435 communities – thus leading to correlated diversity patterns among these three biotic groups.

436         This elevation gradient study in the Peruvian Andes demonstrates how temperature  
437 fundamentally shapes plant, bacterial and fungal diversity in tropical forests, whether directly  
438 for each group, or indirectly for microbial groups through temperature effects on plant  
439 communities and production. Consistent trends in both  $\alpha$ - and  $\beta$ -diversity were observed  
440 across the principal organismal groups of plants, bacteria and fungi, suggesting that stronger  
441 interactions occur among these groups than has been recognised previously. The role of  
442 temperature in driving these co-ordinated patterns was revealed by the occurrence in our

443 study transect of constrained variation in soil pH and moisture, and by intensive sampling  
444 across space, and in separate soil horizons. We suggest that this relationship is often obscured  
445 across unconstrained environmental gradients often associated with differences in elevation  
446 and latitude (Bryant et al. 2008, Tedersoo et al. 2014), and its detection is further hindered by  
447 shallower diversity gradients for soil microbes compared to plants (figures 2-3) (Tedersoo et  
448 al. 2014, Zhou et al. 2016). Our findings imply that, where other influences such as soil pH  
449 and moisture remain relatively constrained, anticipated future temperature change will have  
450 significant co-ordinated impacts on the identity and functioning (above- and below-ground)  
451 of tropical biota.

452

453

#### 454 **References**

- 455 Abarenkov, K., R. H. Nilsson, K. H. Larsson, I. J. Alexander, U. Eberhardt, S. Erland, K. Hoiland, R.  
456 Kjoller, E. Larsson, T. Pennanen, R. Sen, A. F. S. Taylor, L. Tedersoo, B. M. Ursing, T. Vralstad,  
457 K. Liimatainen, U. Peintner, and U. Koljalg. 2010. The UNITE database for molecular  
458 identification of fungi - recent updates and future perspectives. *New Phytologist* **186**:281-  
459 285.
- 460 Baas Beeking, L. G. M. 1934. *Geobiologie of inleiding tot de milieukunde*. W.P. Van Stockum & Zoon,  
461 The Hague, the Netherlands.
- 462 Barberán, A., K. L. McGuire, J. A. Wolf, F. A. Jones, S. J. Wright, B. L. Turner, A. Essene, S. P. Hubbell,  
463 B. C. Faircloth, and N. Fierer. 2015. Relating belowground microbial composition to the  
464 taxonomic, phylogenetic, and functional trait distributions of trees in a tropical forest.  
465 *Ecology Letters* **18**:1397-1405.
- 466 Bardgett, R. D., and W. H. van der Putten. 2014. Belowground biodiversity and ecosystem  
467 functioning. *Nature* **515**:505-511.
- 468 Bruijnzeel, L. A., F. N. Scatena, and L. S. Hamilton. 2011. *Tropical Montane Cloud Forests*. Cambridge  
469 University Press, Cambridge, UK.
- 470 Bryant, J. A., C. Lamanna, H. Morlon, A. J. Kerkhoff, B. J. Enquist, and J. L. Green. 2008. Microbes on  
471 mountainsides: Contrasting elevational patterns of bacterial and plant diversity. *Proceedings*  
472 *of the National Academy of Sciences of the United States of America* **105**:11505-11511.
- 473 Choma, M., J. Barta, H. Santruckova, and T. Urich. 2016. Low abundance of Archaeorhizomycetes  
474 among fungi in soil metatranscriptomes. *Scientific Reports* **6**.
- 475 Clark, K. E., R. G. Hilton, A. J. West, Y. Malhi, D. R. Gröcke, C. L. Bryant, P. L. Ascoug, A. Robles  
476 Caceres, and M. New. 2013. New views on “old” carbon in the Amazon River: Insight from  
477 the source of organic carbon eroded from the Peruvian Andes. *Geochemistry, Geophysics,*  
478 *Geosystems* **14**:1644-1659.

- 479 Clarke, K. R., and M. Ainsworth. 1993. A Method of Linking Multivariate Community Structure to  
480 Environmental Variables. *Marine Ecology Progress Series* **92**:205-219.
- 481 Colwell, R. K., G. Brehm, C. L. Cardelus, A. C. Gilman, and J. T. Longino. 2008. Global warming,  
482 elevational range shifts, and lowland biotic attrition in the wet tropics. *Science* **322**:258-261.
- 483 de Vries, F. T., P. Manning, J. R. Tallwin, S. R. Mortimer, E. S. Pilgrim, K. A. Harrison, P. J. Hobbs, H.  
484 Quirk, B. Shipley, J. H. Cornelissen, J. Kattge, R. D. Bardgett, and N. Johnson. 2012. Abiotic  
485 drivers and plant traits explain landscape-scale patterns in soil microbial communities.  
486 *Ecology Letters* **15**:1230-1239.
- 487 Duque, A., P. R. Stevenson, and K. J. Feeley. 2015. Thermophilization of adult and juvenile tree  
488 communities in the northern tropical Andes. *Proceedings of the National Academy of  
489 Sciences of the United States of America* **112**:10744-10749.
- 490 Fanin, N., S. Hattenschwiler, S. Barantal, H. Schimann, and N. Fromin. 2011. Does variability in litter  
491 quality determine soil microbial respiration in an Amazonian rainforest? *Soil Biology &  
492 Biochemistry* **43**:1014-1022.
- 493 Fanin, N., S. Hattenschwiler, and N. Fromin. 2014. Litter fingerprint on microbial biomass, activity,  
494 and community structure in the underlying soil. *Plant and Soil* **379**:79-91.
- 495 Fierer, N., M. A. Bradford, and R. B. Jackson. 2007. Toward an ecological classification of soil  
496 bacteria. *Ecology* **88**:1354-1364.
- 497 Fierer, N., and R. B. Jackson. 2006. The diversity and biogeography of soil bacterial communities.  
498 *Proceedings of the National Academy of Sciences of the United States of America* **103**:626-  
499 631.
- 500 Fierer, N., J. W. Leff, B. J. Adams, U. N. Nielsen, S. T. Bates, C. L. Lauber, S. Owens, J. A. Gilbert, D. H.  
501 Wall, and J. G. Caporaso. 2012. Cross-biome metagenomic analyses of soil microbial  
502 communities and their functional attributes. *Proceedings of the National Academy of  
503 Sciences of the United States of America* **109**:21390-21395.
- 504 Fierer, N., C. M. McCain, P. Meir, M. Zimmermann, J. M. Rapp, M. R. Silman, and R. Knight. 2011.  
505 Microbes do not follow the elevational diversity patterns of plants and animals. *Ecology*  
506 **92**:797-804.
- 507 Geml, J. 2017. Altitudinal Gradients in Mycorrhizal Symbioses. Pages 107-123 in L. Tedersoo, editor.  
508 *Biogeography of Mycorrhizal Symbiosis*. Springer International Publishing, Cham.
- 509 Geml, J., L. N. Morgado, T. A. Semenova-Nelsen, and M. Schilthuizen. 2017. Changes in richness and  
510 community composition of ectomycorrhizal fungi among altitudinal vegetation types on  
511 Mount Kinabalu in Borneo. *New Phytologist* **215**:454-468.
- 512 Geml, J., N. Pastor, L. Fernandez, S. Pacheco, T. A. Semenova, A. G. Becerra, C. Y. Wicaksono, and E.  
513 R. Nouhra. 2014. Large-scale fungal diversity assessment in the Andean Yungas forests  
514 reveals strong community turnover among forest types along an altitudinal gradient.  
515 *Molecular Ecology* **23**:2452-2472.
- 516 Handa, I. T., R. Aerts, F. Berendse, M. P. Berg, A. Bruder, O. Butenschoen, E. Chauvet, M. O. Gessner,  
517 J. Jabiol, M. Makkonen, B. G. McKie, B. Malmqvist, E. T. H. M. Peeters, S. Scheu, B. Schmid, J.  
518 van Ruijven, V. C. A. Vos, and S. Hattenschwiler. 2014. Consequences of biodiversity loss for  
519 litter decomposition across biomes. *Nature* **509**:218-221.
- 520 Hattenschwiler, S., B. Aeschlimann, M. M. Couteaux, J. Roy, and D. Bonal. 2008. High variation in  
521 foliage and leaf litter chemistry among 45 tree species of a neotropical rainforest  
522 community. *The New phytologist* **179**:165-175.
- 523 Janzen, D. H. 1967. Why Mountain Passes Are Higher in Tropics. *American Naturalist* **101**:233-&.
- 524 Kivlin, S. N., J. S. Lynn, M. R. Kazenel, K. K. Beals, and J. A. Rudgers. 2017. Biogeography of plant-  
525 associated fungal symbionts in mountain ecosystems: A meta-analysis. *Diversity and  
526 Distributions* **23**:1067-1077.
- 527 Lauber, C. L., N. Zhou, J. I. Gordon, R. Knight, and N. Fierer. 2010. Effect of storage conditions on the  
528 assessment of bacterial community structure in soil and human-associated samples. *Fems  
529 Microbiology Letters* **307**:80-86.

- 530 Looby, C. I., M. R. Maltz, and K. K. Treseder. 2016. Belowground responses to elevation in a changing  
531 cloud forest. *Ecology and Evolution* **6**:1996-2009.
- 532 Mangan, S. A., S. A. Schnitzer, E. A. Herre, K. M. Mack, M. C. Valencia, E. I. Sanchez, and J. D. Bever.  
533 2010. Negative plant-soil feedback predicts tree-species relative abundance in a tropical  
534 forest. *Nature* **466**:752-755.
- 535 Martiny, J. B. H., B. J. M. Bohannan, J. H. Brown, R. K. Colwell, J. A. Fuhrman, J. L. Green, M. C.  
536 Horner-Devine, M. Kane, J. A. Krumins, C. R. Kuske, P. J. Morin, S. Naeem, L. Ovreas, A. L.  
537 Reysenbach, V. H. Smith, and J. T. Staley. 2006. Microbial biogeography: putting  
538 microorganisms on the map. *Nature Reviews Microbiology* **4**:102-112.
- 539 McDonald, D., M. N. Price, J. Goodrich, E. P. Nawrocki, T. Z. DeSantis, A. Probst, G. L. Andersen, R.  
540 Knight, and P. Hugenholtz. 2012. An improved Greengenes taxonomy with explicit ranks for  
541 ecological and evolutionary analyses of bacteria and archaea. *Isme Journal* **6**:610-618.
- 542 Merckx, V. S. F. T., K. P. Hendriks, K. K. Beentjes, C. B. Mennes, L. E. Becking, K. T. C. A. Peijnenburg,  
543 A. Afendy, N. Arumugam, H. de Boer, A. Biun, M. M. Buang, P. P. Chen, A. Y. C. Chung, R.  
544 Dow, F. A. A. Feijen, H. Feijen, C. F. V. Soest, J. Geml, R. Geurts, B. Gravendeel, P.  
545 Hovenkamp, P. Imbun, I. Ipor, S. B. Janssens, M. Jocque, H. Kappes, E. Khoo, P. Koomen, F.  
546 Lens, R. J. Majapun, L. N. Morgado, S. Neupane, N. Nieser, J. T. Pereira, H. Rahman, S.  
547 Sabran, A. Sawang, R. M. Schwallier, P. S. Shim, H. Smit, N. Sol, M. Spait, M. Stech, F. Stokvis,  
548 J. B. Sugau, M. Suleiman, S. Sumail, D. C. Thomas, J. van Tol, F. Y. Y. Tuh, B. E. Yahya, J. Nais,  
549 R. Repin, M. Lakim, and M. Schilthuizen. 2015. Evolution of endemism on a young tropical  
550 mountain. *Nature* **524**:347-+.
- 551 Nottingham, A. T., B. L. Turner, P. M. Chamberlain, A. W. Stott, and E. V. J. Tanner. 2012. Priming and  
552 microbial nutrient limitation in lowland tropical forest soils of contrasting fertility.  
553 *Biogeochemistry* **111**:219-237.
- 554 Nottingham, A. T., B. L. Turner, J. Whitaker, N. Ostle, N. P. McNamara, R. D. Bardgett, N. Salinas, and  
555 P. Meir. 2015a. Soil microbial nutrient constraints along a tropical forest elevation gradient:  
556 a belowground test of a biogeochemical paradigm. *Biogeosciences* **12**:6489-6523.
- 557 Nottingham, A. T., J. Whitaker, B. L. Turner, N. Salinas, M. Zimmermann, Y. Malhi, and P. Meir.  
558 2015b. Climate Warming and Soil Carbon in Tropical Forests: Insights from an Elevation  
559 Gradient in the Peruvian Andes. *Bioscience* **65**:906-921.
- 560 Orwin, K. H., S. M. Buckland, D. Johnson, B. L. Turner, S. Smart, S. Oakley, and R. D. Bardgett. 2010.  
561 Linkages of plant traits to soil properties and the functioning of temperate grassland. *Journal*  
562 *of Ecology* **98**:1074-1083.
- 563 Pan, Y., R. A. Birdsey, J. Fang, R. Houghton, P. E. Kauppi, W. A. Kurz, O. L. Phillips, A. Shvidenko, S. L.  
564 Lewis, J. G. Canadell, P. Ciais, R. B. Jackson, S. W. Pacala, A. D. McGuire, S. Piao, A.  
565 Rautiainen, S. Sitch, and D. Hayes. 2011. A large and persistent carbon sink in the world's  
566 forests. *Science* **333**:988-993.
- 567 Peay, K. G., C. von Sperber, E. Cardarelli, H. Toju, C. A. Francis, O. A. Chadwick, and P. M. Vitousek.  
568 2017. Convergence and contrast in the community structure of Bacteria, Fungi and Archaea  
569 along a tropical elevation-climate gradient. *Fems Microbiology Ecology* **93**.
- 570 Pianka, E. R. 1966. Latitudinal Gradients in Species Diversity - a Review of Concepts. *American*  
571 *Naturalist* **100**:33-&.
- 572 Prober, S. M., J. W. Leff, S. T. Bates, E. T. Borer, J. Firn, W. S. Harpole, E. M. Lind, E. W. Seabloom, P.  
573 B. Adler, J. D. Bakker, E. E. Cleland, N. M. DeCrappeo, E. DeLorenze, N. Hagenah, Y. Hautier,  
574 K. S. Hofmockel, K. P. Kirkman, J. M. H. Knops, K. J. La Pierre, A. S. MacDougall, R. L.  
575 McCulley, C. E. Mitchell, A. C. Risch, M. Schuetz, C. J. Stevens, R. J. Williams, and N. Fierer.  
576 2015. Plant diversity predicts beta but not alpha diversity of soil microbes across grasslands  
577 worldwide. *Ecology Letters* **18**:85-95.
- 578 Rahbek, C. 2005. The role of spatial scale and the perception of large-scale species-richness patterns.  
579 *Ecology Letters* **8**:224-239.

- 580 Rapp, J. M., M. R. Silman, J. S. Clark, C. A. J. Girardin, D. Galiano, and R. Tito. 2012. Intra- and  
581 interspecific tree growth across a long altitudinal gradient in the Peruvian Andes. *Ecology*  
582 **93**:2061-2072.
- 583 Rosling, A., F. Cox, K. Cruz-Martinez, K. Ihrmark, G. A. Grelet, B. D. Lindahl, A. Menkis, and T. Y.  
584 James. 2011. Archaeorhizomycetes: Unearthing an Ancient Class of Ubiquitous Soil Fungi.  
585 *Science* **333**:876-879.
- 586 Salinas, N., Y. Malhi, P. Meir, M. Silman, R. Roman Cuesta, J. Huaman, D. Salinas, V. Huaman, A.  
587 Gibaja, M. Mamani, and F. Farfan. 2010. The sensitivity of tropical leaf litter decomposition  
588 to temperature: results from a large-scale leaf translocation experiment along an elevation  
589 gradient in Peruvian forests. *New Phytologist* **189**:967-977.
- 590 Selmants, P. C., K. L. Adair, C. M. Litton, C. P. Giardina, and E. Schwartz. 2016. Increases in mean  
591 annual temperature do not alter soil bacterial community structure in tropical montane wet  
592 forests. *Ecosphere* **7**:n/a-n/a.
- 593 Shen, C. C., W. J. Liang, Y. Shi, X. G. Lin, H. Y. Zhang, X. Wu, G. Xie, P. Chain, P. Grogan, and H. Y. Chu.  
594 2014. Contrasting elevational diversity patterns between eukaryotic soil microbes and  
595 plants. *Ecology* **95**:3190-3202.
- 596 Shen, C. C., J. B. Xiong, H. Y. Zhang, Y. Z. Feng, X. G. Lin, X. Y. Li, W. J. Liang, and H. Y. Chu. 2013. Soil  
597 pH drives the spatial distribution of bacterial communities along elevation on Changbai  
598 Mountain. *Soil Biology & Biochemistry* **57**:204-211.
- 599 Singh, D., L. Lee-Cruz, W. S. Kim, D. Kerfahi, J. H. Chun, and J. M. Adams. 2014. Strong elevational  
600 trends in soil bacterial community composition on Mt. Ha Ila, South Korea. *Soil Biology &*  
601 *Biochemistry* **68**:140-149.
- 602 Tedersoo, L., M. Bahram, S. Polme, U. Koljalg, N. S. Yorou, R. Wijesundera, L. V. Ruiz, A. M. Vasco-  
603 Palacios, P. Q. Thu, A. Suija, M. E. Smith, C. Sharp, E. Saluveer, A. Saitta, M. Rosas, T. Riit, D.  
604 Ratkowsky, K. Pritsch, K. Poldmaa, M. Piepenbring, C. Phosri, M. Peterson, K. Parts, K. Partel,  
605 E. Otsing, E. Nouhra, A. L. Njouonkou, R. H. Nilsson, L. N. Morgado, J. Mayor, T. W. May, L.  
606 Majuakim, D. J. Lodge, S. S. Lee, K. H. Larsson, P. Kohout, K. Hosaka, I. Hiiesalu, T. W. Henkel,  
607 H. Harend, L. D. Guo, A. Greslebin, G. Grelet, J. Geml, G. Gates, W. Dunstan, C. Dunk, R.  
608 Drenkhan, J. Dearnaley, A. De Kesel, T. Dang, X. Chen, F. Buegger, F. Q. Brearley, G. Bonito, S.  
609 Anslan, S. Abell, and K. Abarenkov. 2014. Global diversity and geography of soil fungi.  
610 *Science* **346**:1078.
- 611 Turner, B. L., and T. E. Romero. 2010. Stability of hydrolytic enzyme activity and microbial  
612 phosphorus during storage of tropical rain forest soils. *Soil Biology and Biochemistry* **42**:459-  
613 465.
- 614 van de Weg, M. J., P. Meir, J. Grace, and O. K. Atkin. 2009. Altitudinal variation in leaf mass per unit  
615 area, leaf tissue density and foliar nitrogen and phosphorus content along an Amazon-Andes  
616 gradient in Peru. *Plant Ecology & Diversity* **2**:243-254.
- 617 van de Weg, M. J., P. Meir, M. Williams, C. Girardin, Y. Malhi, J. Silva-Espejo, and J. Grace. 2014.  
618 Gross primary productivity of a high elevation tropical montane cloud forest. *Ecosystems*  
619 **17**:751-764.
- 620 von Humboldt, A., and A. Bonpland. 1805. *Essai sur la géographie des plantes*. Chez Levrault, Scoell  
621 et Campagne, Librairie, Paris.
- 622 Wang, Q., G. M. Garrity, J. M. Tiedje, and J. R. Cole. 2007. Naive Bayesian classifier for rapid  
623 assignment of rRNA sequences into the new bacterial taxonomy. *Applied and Environmental*  
624 *Microbiology* **73**:5261-5267.
- 625 Whitaker, J., N. Ostle, A. T. Nottingham, A. Ccahuana, N. Salinas, R. D. Bardgett, P. Meir, and N. P.  
626 McNamara. 2014. Microbial community composition explains soil respiration responses to  
627 changing carbon inputs along an Andes-to-Amazon elevation gradient. *Journal of Ecology*  
628 **102**:1058-1071.

- 629 Whitman, W. B., D. C. Coleman, and W. J. Wiebe. 1998. Prokaryotes: The unseen majority.  
630 Proceedings of the National Academy of Sciences of the United States of America **95**:6578-  
631 6583.
- 632 Zhou, J. Z., Y. Deng, L. N. Shen, C. Q. Wen, Q. Y. Yan, D. L. Ning, Y. J. Qin, K. Xue, L. Y. Wu, Z. L. He, J.  
633 W. Voordeckers, J. D. Van Nostrand, V. Buzzard, S. T. Michaletz, B. J. Enquist, M. D. Weiser,  
634 M. Kaspari, R. Waide, Y. F. Yang, and J. H. Brown. 2016. Temperature mediates continental-  
635 scale diversity of microbes in forest soils. Nature Communications **7**.
- 636 Zimmermann, M., P. Meir, M. I. Bird, Y. Malhi, and A. J. Q. Ccahuana. 2010. Temporal variation and  
637 climate dependence of soil respiration and its components along a 3000 m altitudinal  
638 tropical forest gradient. Global Biogeochemical Cycles **24**:GB4012.

639

640

641

642

643

644

645

646

647

648

649

650

651

652

653

654

655

656 **Table 1. Final models of effects of climatic and edaphic parameters on  $\alpha$ -diversity in the**  
 657 **five groups.** Final models after removal of all non-significant variables: linear model for  
 658 plants (n = 13) and linear mixed models for fungi/bacteria (with site as random effect; n =  
 659 42). MAT: mean annual temperature; MAP: mean annual precipitation; ECEC: cation  
 660 exchange capacity; resinP: resin-extractable P (for full models with all six variables for each  
 661 measure of  $\alpha$ -diversity, see table S3). ‘Prop. variance’ gives the proportion of variance  
 662 explained by each fixed effect; ‘Marginal R<sup>2</sup>’ that explained by all the fixed effects together;  
 663 conditional R<sup>2</sup> that explained by both fixed and random effects (see Methods).

664

| <b>(a) Plants</b>            | Parameter                | SE                         | t      | p-value | Prop. variance |
|------------------------------|--------------------------|----------------------------|--------|---------|----------------|
| (Intercept)                  | 1.312                    | 0.179                      | 7.324  | 0       |                |
| MAT                          | 0.108                    | 0.009                      | 12.29  | 0       | 0.821          |
| MAP                          | 2.393x10 <sup>-4</sup>   | 0.438x10 <sup>-4</sup>     | 5.461  | 0       | 0.119          |
| R <sup>2</sup>               | 0.940                    |                            |        |         |                |
| <b>(b) Fungal organic</b>    | Parameter                | SE                         | t      | p-value |                |
| (Intercept)                  | 5.904                    | 0.158                      | 37.449 | 0       |                |
| ECEC                         | -0.012                   | 0.003                      | -3.823 | 0.002   | 0.385          |
| Random effects variance      |                          |                            |        |         |                |
| Site                         | 0.040                    |                            |        |         |                |
| Residual                     | 0.066                    |                            |        |         |                |
| Marginal R <sup>2</sup>      | 0.385                    | Conditional R <sup>2</sup> | 0.619  |         |                |
| <b>(c) Fungal mineral</b>    | Parameter                | SE                         | t      | p-value |                |
| (Intercept)                  | 4.834                    | 0.16                       | 30.201 | 0       |                |
| MAT                          | 0.034                    | 0.01                       | 3.382  | 0.004   | 0.342          |
| Random effects variance      |                          |                            |        |         |                |
| Site                         | 0.037                    |                            |        |         |                |
| Residual                     | 0.049                    |                            |        |         |                |
| Marginal R <sup>2</sup>      | 0.342                    | Conditional R <sup>2</sup> | 0.627  |         |                |
| <b>(d) Bacterial organic</b> | Parameter                | SE                         | t      | p-value |                |
| (Intercept)                  | 8.056                    | 0.247                      | 32.64  | 0       |                |
| MAT                          | 0.048                    | 0.013                      | 3.645  | 0.003   | 0.575          |
| resinP                       | -2.33 x 10 <sup>-3</sup> | -0.58 x 10 <sup>-3</sup>   | -3.972 | 0.001   | 0.199          |
| Random effects variance      |                          |                            |        |         |                |
| Site                         | 0.057                    |                            |        |         |                |
| Residual                     | 0.029                    |                            |        |         |                |
| Marginal R <sup>2</sup>      | 0.774                    | Conditional R <sup>2</sup> | 0.922  |         |                |
| <b>(e) Bacterial mineral</b> | Parameter                | SE                         | t      | p-value |                |
| (Intercept)                  | 8.213                    | 0.19                       | 43.2   | 0       |                |
| MAT                          | 0.031                    | 0.012                      | 2.568  | 0.022   | 0.294          |
| Random effects variance      |                          |                            |        |         |                |
| Site                         | 0.071                    |                            |        |         |                |
| Residual                     | 0.013                    |                            |        |         |                |
| Marginal R <sup>2</sup>      | 0.294                    | Conditional R <sup>2</sup> | 0.889  |         |                |

665

666

667

668

669

670

671



672 **Table 2. The effects of environmental and edaphic variables on plant, bacterial and**  
 673 **fungal  $\beta$ -diversity, determined by multivariate correlation models.** The final models were  
 674 determined by step-wise selection to determine which resemblances matrices for 47 initial  
 675 predictor variables best describe community composition dissimilarity matrices. Significance  
 676 of individual parameters in each model were determined by Mantel tests between  $\beta$ -diversity  
 677 and the specific variable, shown in parentheses. Values are correlation coefficients and \*\*\*  $p$   
 678  $< 0.001$ , \*\*  $p < 0.01$ ,  $p < 0.05$ , ns = not significant.

679

|                                           | Plants          | Bacteria   | Fungi      | Bacteria        | Fungi      |
|-------------------------------------------|-----------------|------------|------------|-----------------|------------|
|                                           | Organic horizon |            |            | Mineral horizon |            |
| MAT                                       | *** (0.91)      | *** (0.77) | * (0.67)   | *** (0.88)      | *** (0.59) |
| Soil pH                                   | ns              | * (0.57)   | ns         | ** (0.47)       | ns         |
| Total C:N                                 | ns              | ** (0.68)  | ns         | ns              | ** (0.38)  |
| Total C:P                                 | ns              | ns         | ** (0.70)  | ns              | ns         |
| Na                                        | ns              | ns         | ns         | * (0.22)        | ns         |
| K                                         | ** (0.44)       | ns         | ns         | ns              | ns         |
| <i>N</i> -acetyl $\beta$ -glucosaminidase | ns              | ns         | *** (0.74) | ns              | ns         |
| Complete model                            | 0.93            | 0.88       | 0.80       | 0.91            | 0.65       |

680

681

682

683

684

685

686

687

688

689

690

691

692

693

694

695 **Figure legends**

696 **Figure 1. The Kosñipata elevation transect, Manu National Park, Peru.** The top panel  
697 shows the highest (3644 m a.s.l.) and lowest elevation (194 m a.s.l.) sites and the relationship  
698 between elevation and mean annual temperature (MAT). The bottom panel shows all sites  
699 from 3644 m a.s.l. to 1500 m a.s.l. viewed facing approximately northeast from the top of the  
700 transect and a photograph of the transect of the same view.

701 **Figure 2. Changes in  $\alpha$ -diversity with elevation** ('elev', in m a.s.l.) in plants, fungi and  
702 bacteria. Fungi and bacteria were sampled from both the organic and the mineral soil horizon,  
703 and each site is represented by three data points. Note the different scales on the y-axes. The  
704 solid lines and confidence intervals show predicted relationships and 95% confidence  
705 intervals from models equivalent to those shown in table S2 but excluding quadratic terms  
706 where they were non-significant. i.e. for the plants, fungal-organic and bacterial-mineral  
707 groups.

708 **Figure 3. The relationships between the ratios of plant to bacterial and plant to fungal**  
709  **$\alpha$ -diversity and elevation, in organic and mineral soil horizons.** Regression lines are  
710 shown with increasing number of dashes for bacterial mineral (solid line), bacterial organic,  
711 fungal mineral and fungal organic (shortest dashes). The stronger coupling of plant and  
712 bacterial diversity (Spearman's correlation:  $\rho = 0.76, 0.70$ ; organic and mineral horizons,  
713 respectively) compared to plant and fungal diversity ( $\rho = 0.14, 0.64$ ), was further reflected in  
714 a greater decline with elevation for the species richness ratio of plants-to-fungi (slope of 1.02)  
715 compared to plants-to-bacteria (slope of 0.59).

716 **Figure 4. The relationship between  $\beta$ -diversity of plants, bacteria and fungi**  
717 **(dissimilarity of communities) with elevation difference.**  $\beta$ -diversity for all groups differed  
718 with elevation (plants:  $p < 0.001$ ,  $F = 79.2$ ,  $DF = 19$ ; bacteria:  $p < 0.001$ ,  $F = 4.5$ ,  $DF = 69$ ;  
719 fungi:  $p < 0.001$ ,  $F = 3.3$ ,  $df = 83$ ; by PERMANOVA). Soil microbial data are shown for  
720 organic soil horizons (there were consistent patterns in mineral horizons). The overall decline  
721 with increased elevation indicates increased dissimilarity in  $\beta$ -diversity between sites with  
722 greater difference in elevation. Elevational declines were fitted with exponential models [ $y =$   
723  $a[1 - \exp(-bx)]$ ]; with parameter estimates for bacteria ( $a = 1.27, 0.001$ ), fungi ( $a = 0.12, b =$   
724  $0.0013$ ) and plants ( $a = 0.424, b = 0.0019$ ).

725

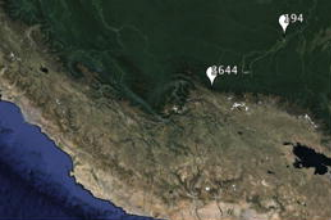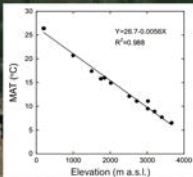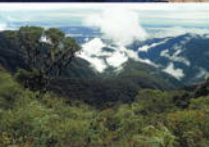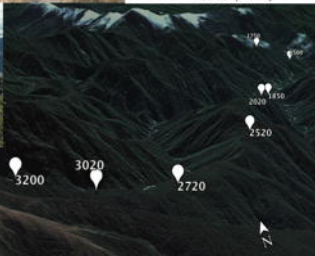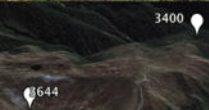

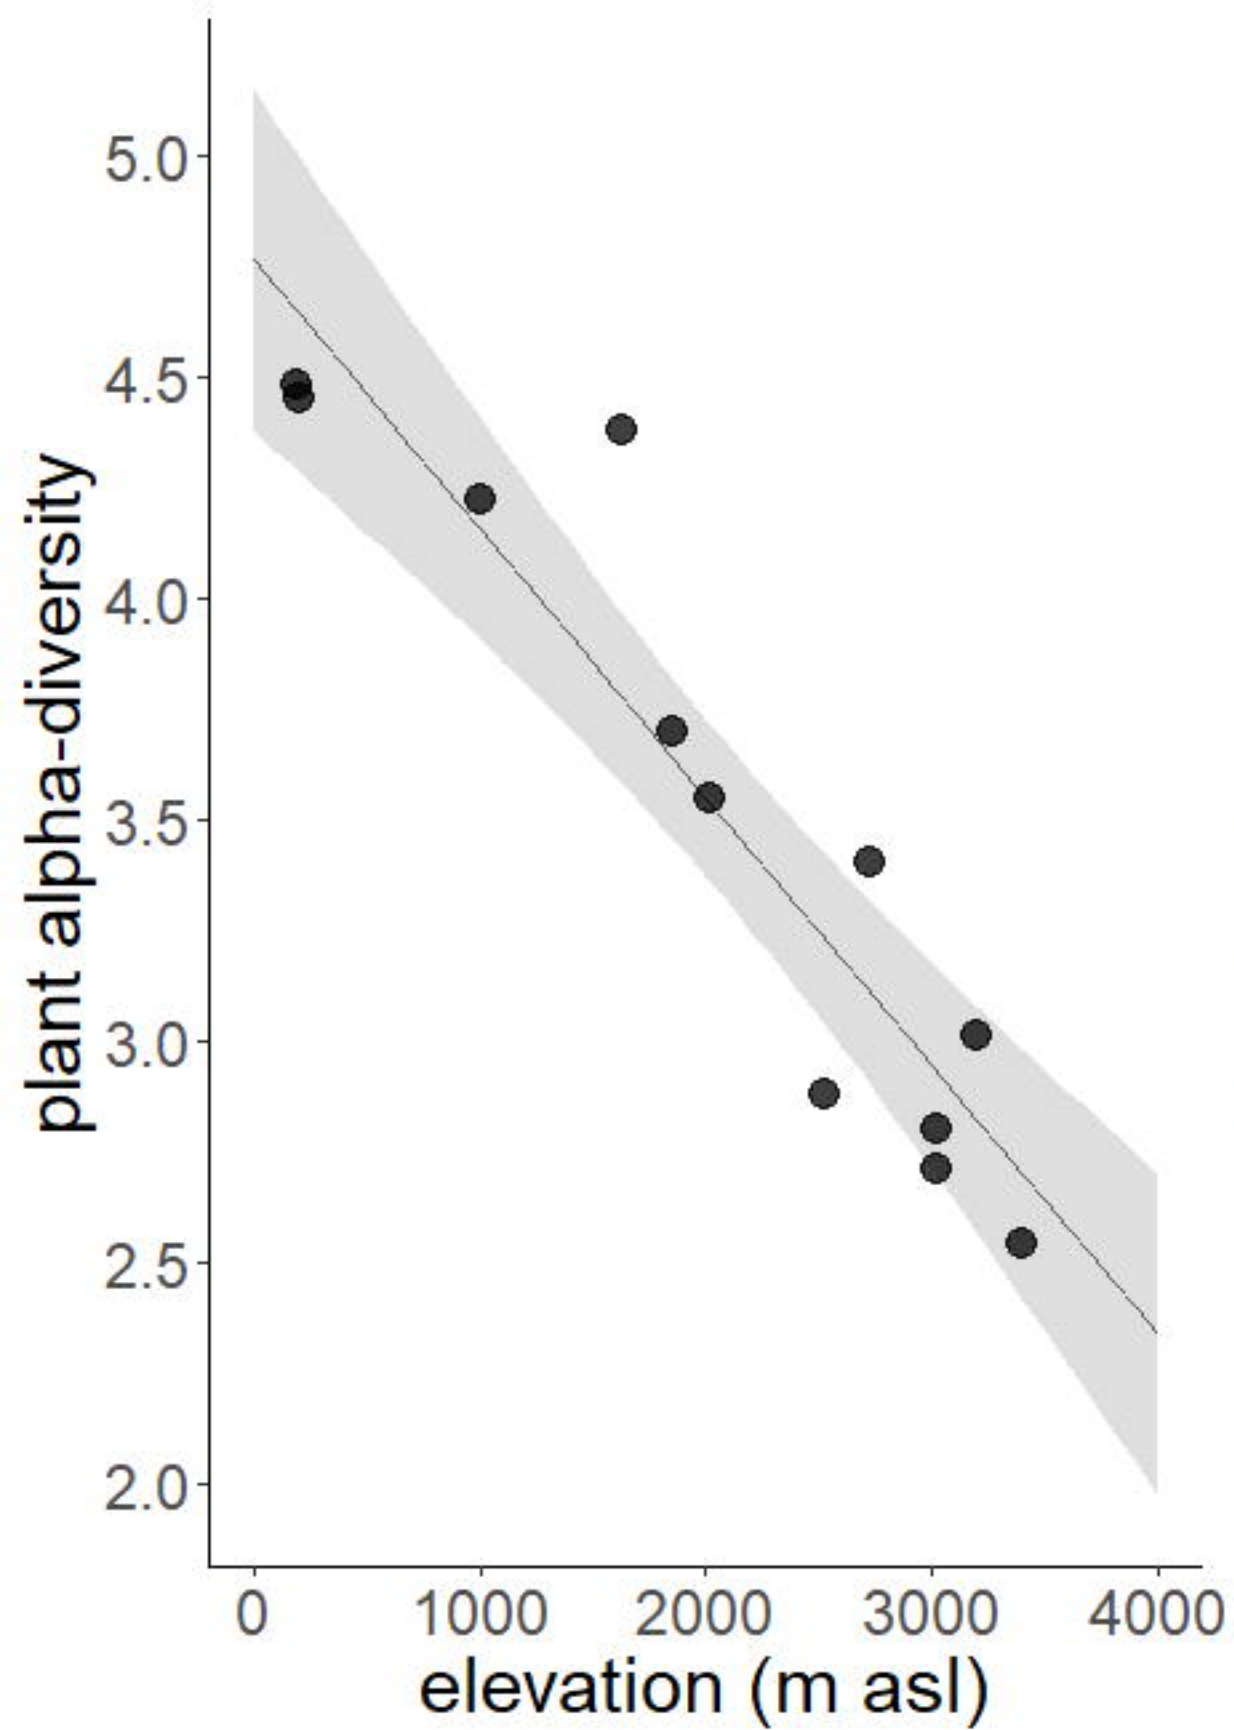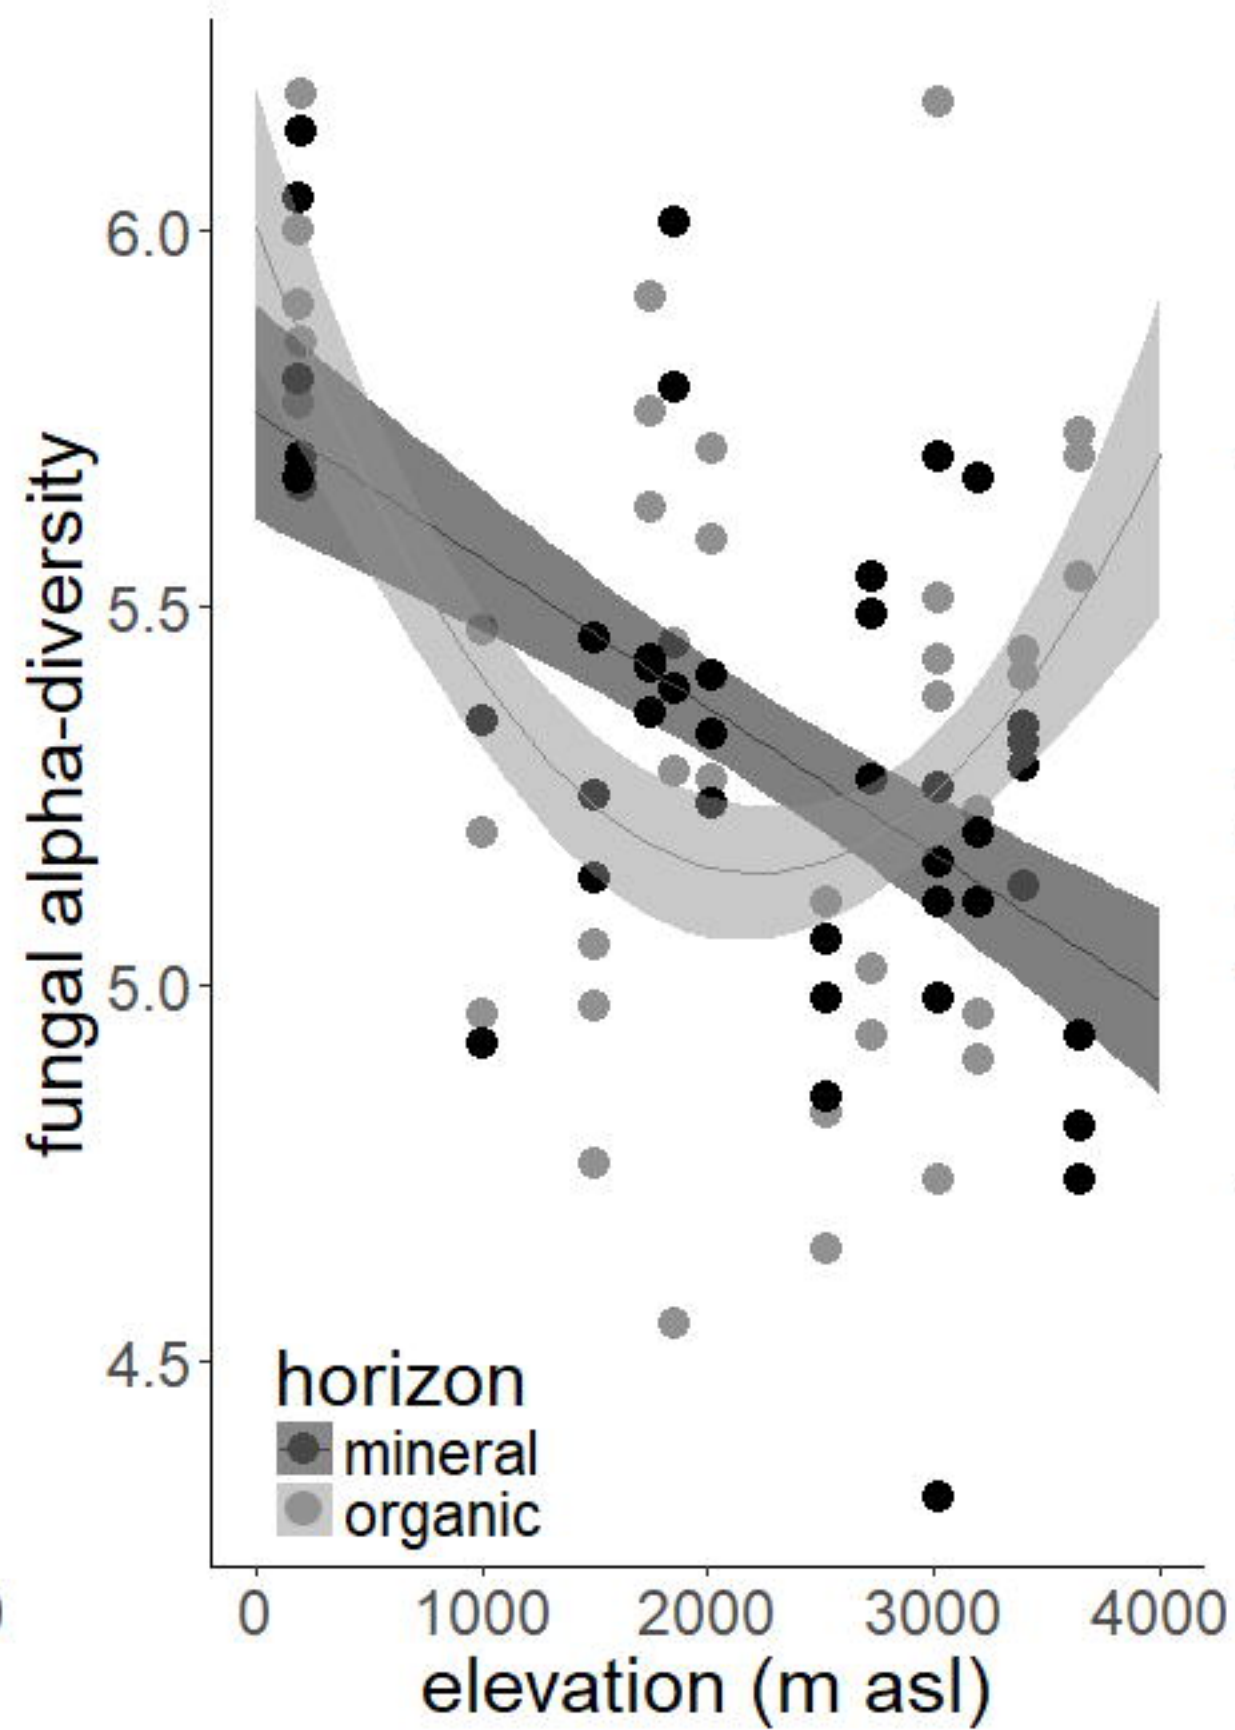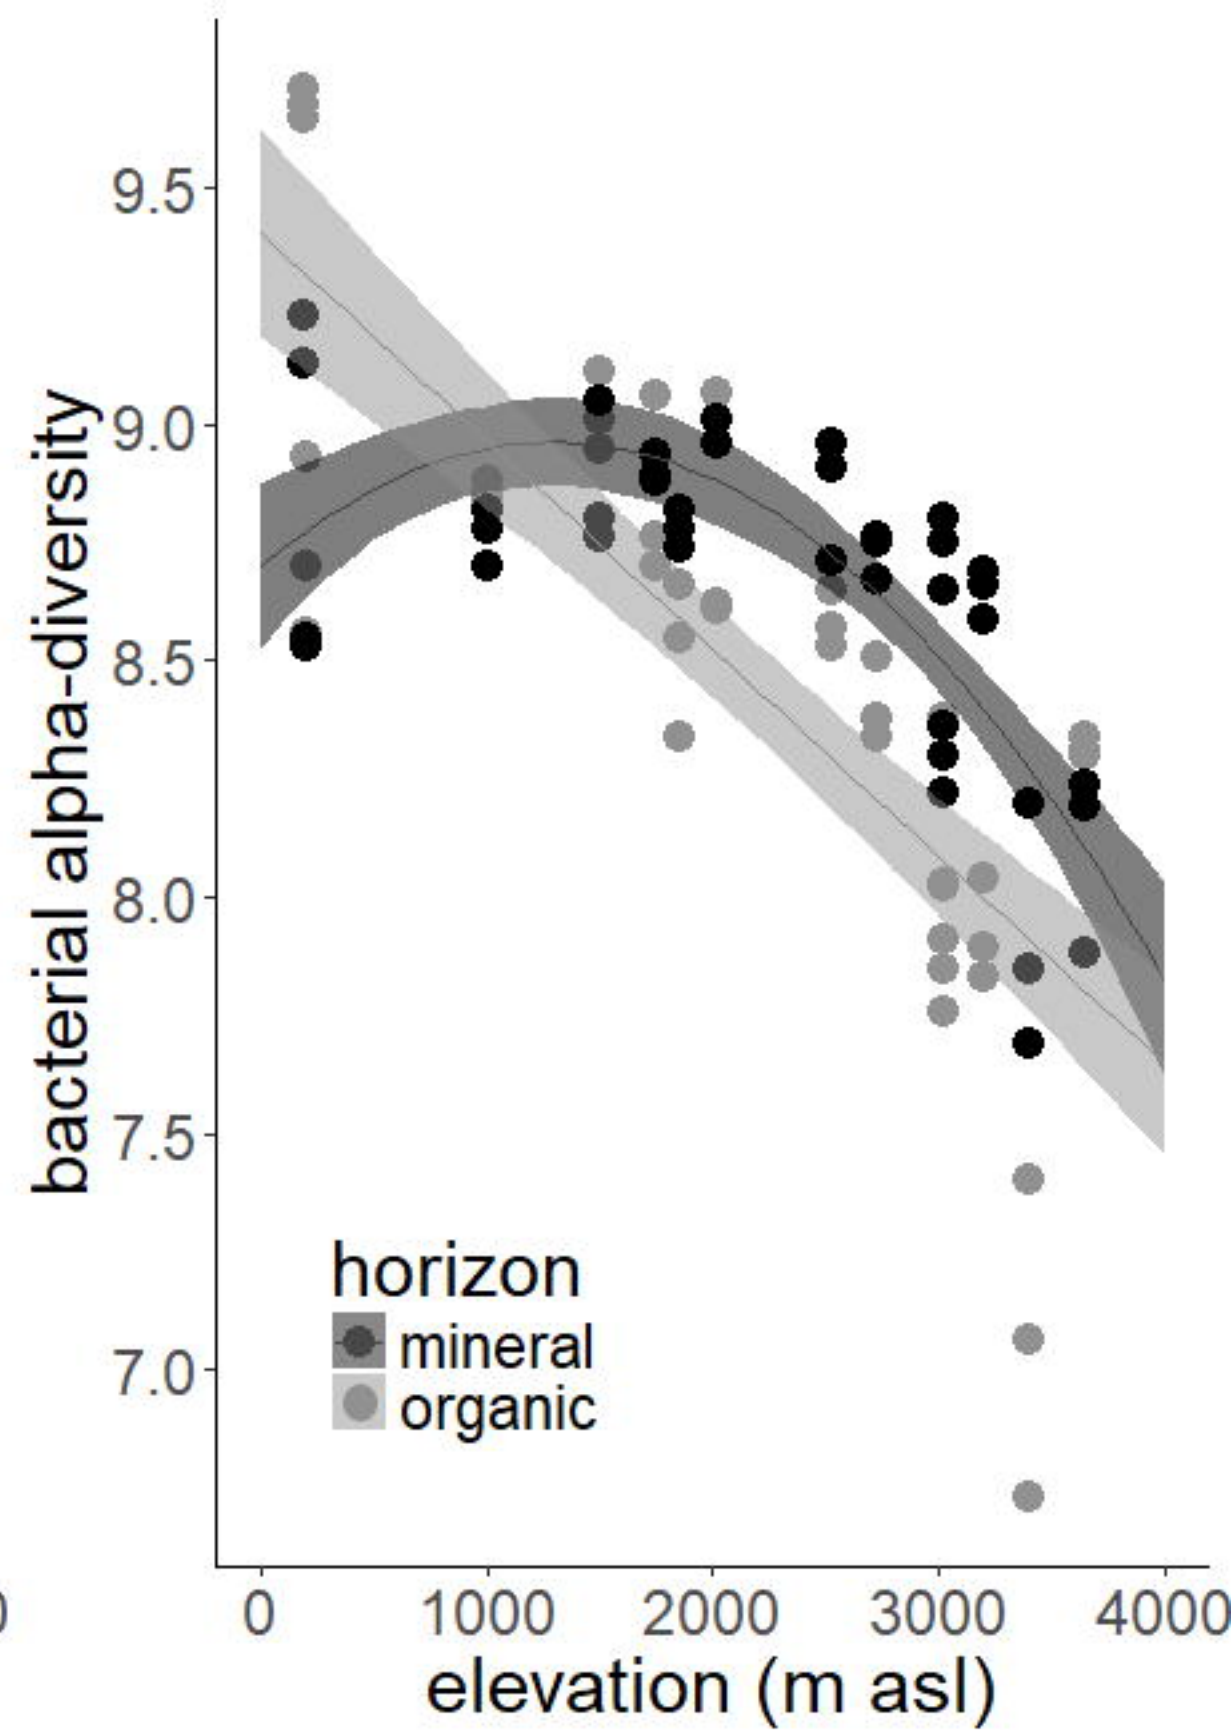

Ratio of plant to microbial Shannon diversity

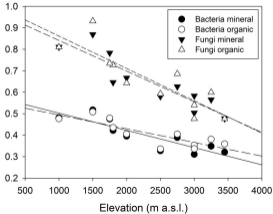

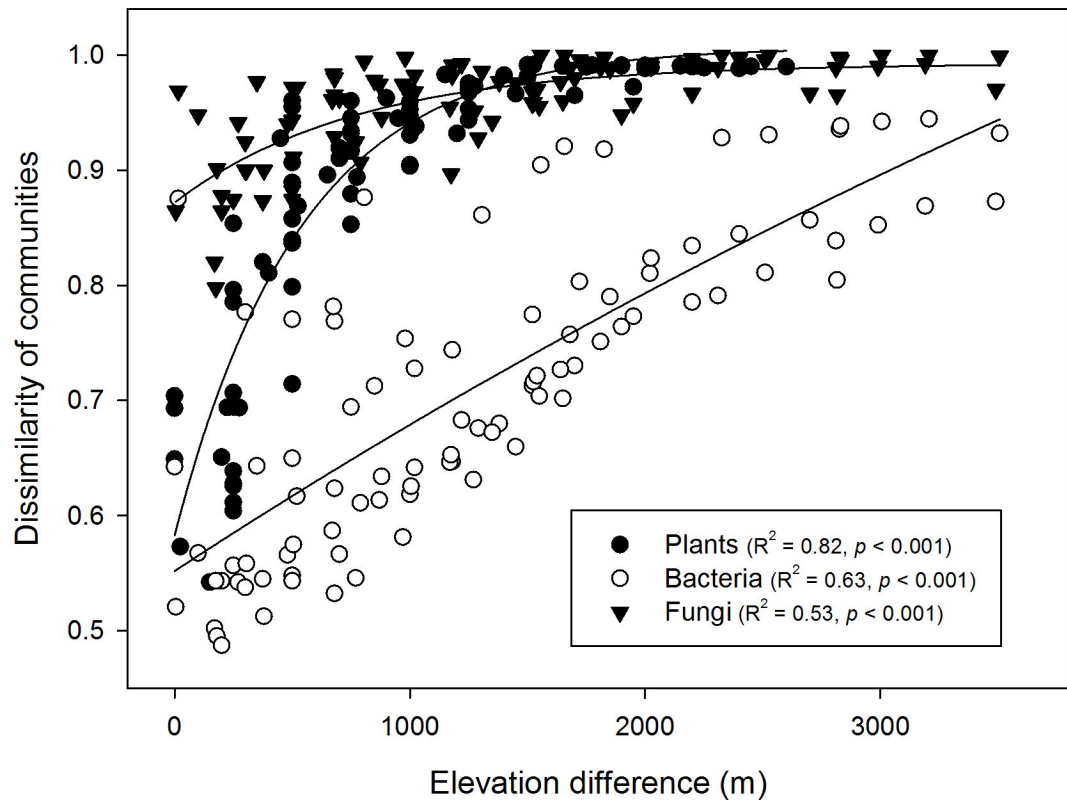

Source: https://www.biorxiv.org/content/biorxiv/early/2018/02/19/079996.full.pdf
